# Supplementary material for: Comparative study of the hydrogen bonding interactions between ester-functionalized/non-functionalized imidazolium-based ionic liquids and DMSO
Source: Royal Society of Chemistry journal article supplement (doi:10.1039/d2cp05048j), 2023-01-01
Supplement: d2cp05048j1.pdf [file d2cp05048j1.pdf]

*Supporting Information for*

**Comparative study of the hydrogen bonding interactions between ester-functionalized/non-functionalized imidazolium-based ionic liquids and DMSO**

Yuxin Jiang, Xianzhen Xu, Mingzhu Wang, Yu Zhou\*, Zonghua Wang\*

*\*Shandong Sino-Japanese Center for Collaborative Research of Carbon Nanomaterials, College of Chemistry and Chemical Engineering, Instrumental Analysis Center of Qingdao University, Qingdao University, Qingdao 266071, China.*

A submission to: *Physical Chemistry Chemical Physics*

**\*To whom correspondence should be addressed.**

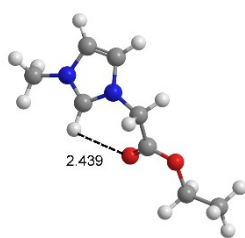

**Fig. S1.** Optimized geometries of [AOEMIM]<sup>+</sup>, Hydrogen bonds were denoted by dashed lines, the corresponding distances of H···O was labelled.

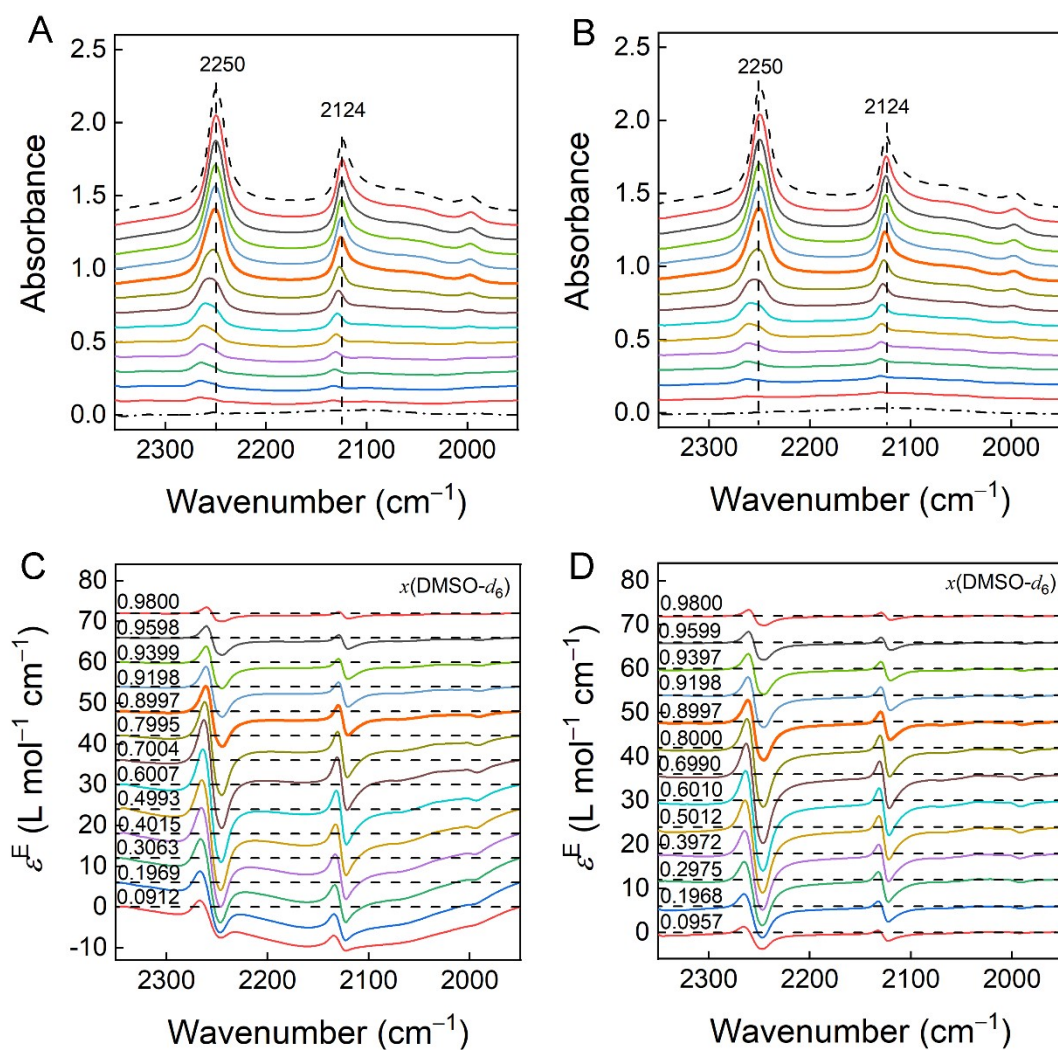

**Fig. S2.** ATR-FTIR and excess spectra of AOEMIMBF<sub>4</sub>-DMSO-*d*<sub>6</sub> (A, C) and BMIMBF<sub>4</sub>-DMSO-*d*<sub>6</sub> (B, D) systems in the range of the C-D stretching vibrations.

The dashed-dotted lines and dashed line in (A, B) depict the spectra of AOEMIMBF<sub>4</sub>/BMIMBF<sub>4</sub> and DMSO-*d*<sub>6</sub>, respectively.
